# Supplementary material for: Optimization of the Sb2S3 Shell Thickness in ZnO Nanowire-Based Extremely Thin Absorber Solar Cells
Source: MDPI journal article supplement (doi:10.3390/nano12020198), 2022-01-07
Supplement: s1 [file s1]

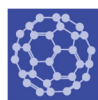

## Supplementary Materials

# Optimization of the $\text{Sb}_2\text{S}_3$ Shell Thickness in ZnO Nanowire-Based Extremely Thin Absorber Solar Cells

Guislain Hector <sup>1</sup>, Jako S. Eensalu <sup>2</sup>, Atanas Katerski <sup>2</sup>, Hervé Roussel <sup>1</sup>, Odette Chaix-Pluchery <sup>1</sup>, Estelle Appert <sup>1</sup>, Fabrice Donatini <sup>3</sup>, Ilona Oja Acik <sup>2</sup>, Erki Kärber <sup>2,\*</sup> and Vincent Consonni <sup>1,\*</sup>

<sup>1</sup> Université Grenoble Alpes, CNRS, Grenoble INP, LMGP, F-38000 Grenoble, France; guislain.hector@grenoble-inp.fr (G.H.); herve.roussel@grenoble-inp.fr (H.R.); odette.chaix@grenoble-inp.fr (O.C.-P.); estelle.appert@grenoble-inp.fr (E.A.)

<sup>2</sup> Laboratory of Thin Film Chemical Technologies, Department of Materials and Environmental Technology, School of Engineering, Tallinn University of Technology, Ehitajate tee 5, 19086 Tallinn, Estonia; jako.eensalu@taltech.ee (J.S.E.); atanas.katerski@taltech.ee (A.K.); ilona.oja@taltech.ee (I.O.A.)

<sup>3</sup> Université Grenoble Alpes, CNRS, Grenoble INP, Institut NEEL, F-38000 Grenoble, France; fabrice.donatini@neel.cnrs.fr

\* Correspondence: erki.karber@taltech.ee (E.K.); vincent.consonni@grenoble-inp.fr (V.C.)

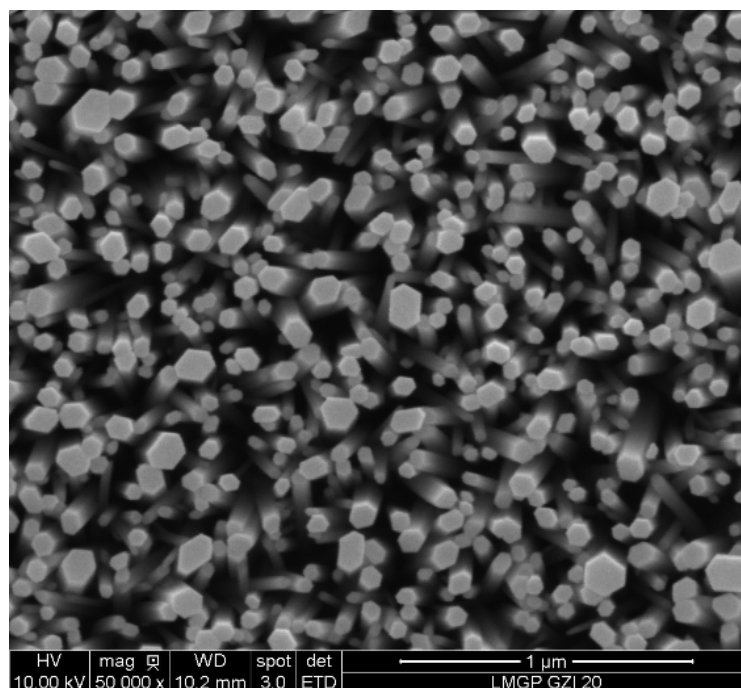

**Figure S1.** Typical top-view FESEM image of ZnO/TiO<sub>2</sub> core-shell NW heterostructures without any Sb<sub>2</sub>S<sub>3</sub> shell.

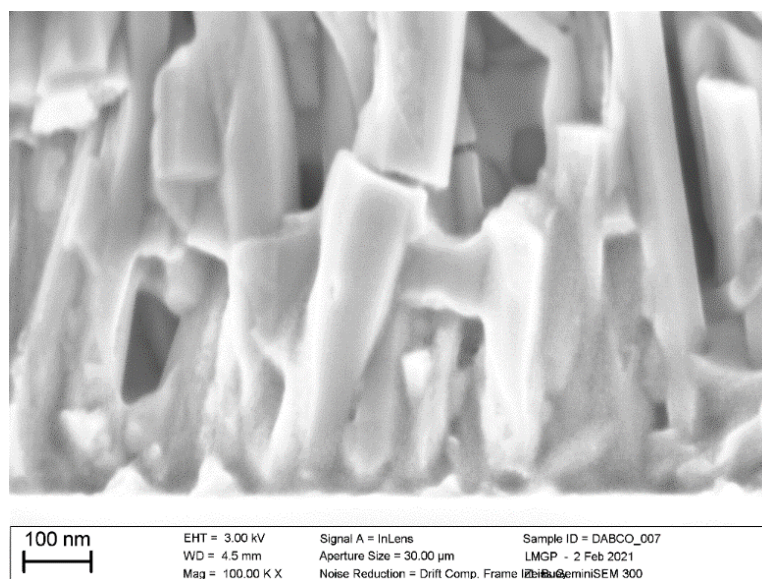

**Figure S2.** High magnification cross-sectional view FESEM image of ZnO/TiO<sub>2</sub> core-shell NW heterostructures covered by a Sb<sub>2</sub>S<sub>3</sub> shell grown by CSP using 70 cycles.

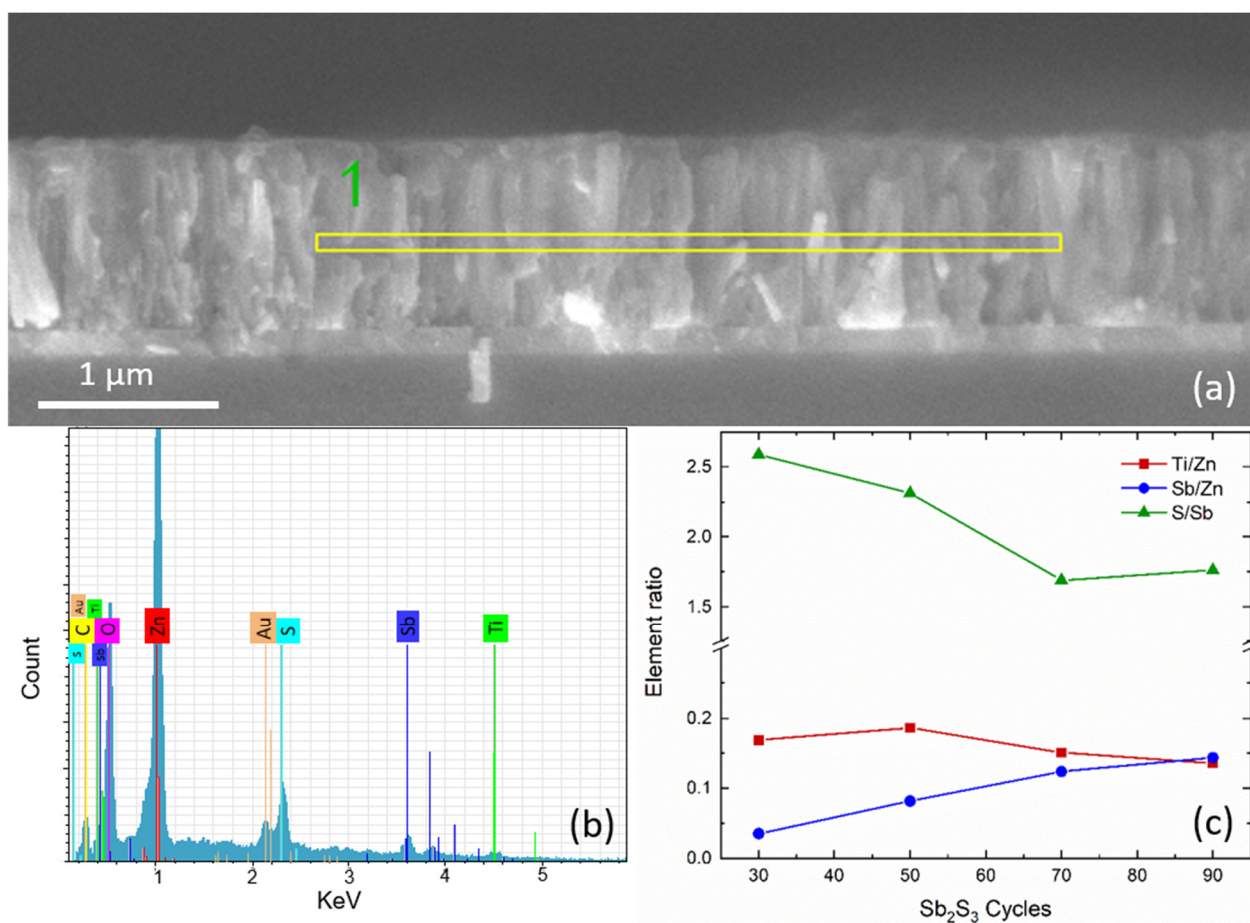

**Figure S3.** (a) Cross-sectional view FESEM image of the complete ETA solar cell structure of ITO/ZnO/TiO<sub>2</sub>/Sb<sub>2</sub>S<sub>3</sub>/P3HT/Au when using the cycle number of 70, (b) FESEM-EDX spectra collected on the yellow rectangular area as denoted in (a), (c) Element ratio as a function of the cycle number ranging from 30 to 90.

**Table S1.** In-plane XRD data recapitulating the nature and position of the diffraction peaks in this work as compared to the 00-042-1393 ICDD file.

| (hkl)                                 | 2-Theta (°)<br>This Work | 2-Theta (°)<br>00-042-1393 ICDD file  |
|---------------------------------------|--------------------------|---------------------------------------|
| (220)                                 | 22.20                    | 22.28                                 |
| (130) – (310)                         | 24.93                    | 24.89 – 25.01                         |
| (111)                                 | 25.65                    | 25.73                                 |
| (121) – (211)                         | 29.20                    | 29.25                                 |
| (301)                                 | 33.38                    | 33.39                                 |
| (131) – (311)                         | 34.19                    | 34.24 – 34.34                         |
| (240) – (420)                         | 35.54                    | 35.52 – 35.64                         |
| (231)                                 | 36.76                    | 36.99                                 |
| (340) – (430) – (141) – (411) – (510) | 40.17                    | 39.91 – 40.00 – 40.38 – 40.57 – 40.89 |
| (250) – (520)                         | 42.98                    | 43.04 – 43.30                         |
| (530) – (002) / (151) – (511)         | 46.80                    | 47.04 – 47.30 – 47.54                 |
| (531)                                 | 52.84                    | 53.04                                 |
| (061) – (132) / (312) – (360)         | 54.00                    | 54.13 – 54.20 – 54.41 – 54.65         |
| (630)                                 | 54.62                    | 54.65                                 |

**Table S2.** Raman scattering data recapitulating the nature and position of the Raman lines in this work as compared to Ref. [1].

| Wavenumber (cm <sup>-1</sup> )<br>This Work | Wavenumber (cm <sup>-1</sup> )<br>Ref. [1] | Vibrational modes                 |
|---------------------------------------------|--------------------------------------------|-----------------------------------|
| 61                                          | 65.7 / 65.8                                | B <sub>1g</sub> / B <sub>3g</sub> |
| 71                                          | 74.7                                       | A <sub>g</sub>                    |
| 90                                          | 92.9                                       | B <sub>2g</sub>                   |
| 100                                         | 100                                        | A <sub>g</sub>                    |
| 115                                         | 112                                        | B <sub>2g</sub>                   |
| 128                                         | 122 / 128                                  | B <sub>2g</sub> / A <sub>g</sub>  |
| 157                                         | 159 / 159                                  | B <sub>2g</sub> / A <sub>g</sub>  |
| 192                                         | 190                                        | A <sub>g</sub>                    |
| 239                                         | 225 / 227                                  | B <sub>1g</sub> / B <sub>3g</sub> |
| 283                                         | 280                                        | A <sub>g</sub>                    |
| 300                                         | 291 / 293                                  | B <sub>2g</sub> / A <sub>g</sub>  |
| 314                                         | 294                                        | B <sub>2g</sub>                   |

## References

1. Ibanez, J.; Sans, J.A.; Popescu, C.; Lopez-Vidrier, J.; Elvira-Betanzos, J.J.; Cuenca-Gotor, V.P.; Gomis, O.; Manjon, F.J.; Rodriguez-Hernandez, P.; Munoz, A. Structural, Vibrational, and Electronic Study of Sb<sub>2</sub>S<sub>3</sub> at High Pressure. *J. Phys. Chem. C* **2016**, *120*, 10547–10558. <https://doi.org/10.1021/acs.jpcc.6b01276>.
